# Supplementary material for: Selective monomethylation of primary amines with simple electrophiles
Source: Royal Society of Chemistry journal article supplement (doi:10.1039/c3cc48997c), 2013-12-16
Supplement: c3cc48997c.pdf [file c3cc48997c.pdf]

## Supplementary Information

### Selective monomethylation of primary amines with simple electrophiles

Thomas LEBLEU, Xiaolu MA, Jacques MADDALUNO and Julien LEGROS\*

#### General remarks

$^1\text{H}$  NMR spectra were obtained on a Bruker 300. In all measurements  $\text{CD}_3\text{OD}$  was used as solvent unless otherwise noted. Chemical shifts  $\delta$  are given in ppm relative to TMS as internal standard. Microflow reactions were performed with Harvard Apparatus syringe pumps (Pump 11 Elite) equipped with Hamilton gastight syringes. Peek (P-885) T-shaped micromixers with swept volume of 29 nL were manufactured by IDEX Health & Science. Peek (1532) microtubes with inner diameter of 500  $\mu\text{m}$  and peek fittings were also purchased from IDEX Health & Science. All chemicals were used as provided without further purification. The conversion of amine into products was measured by  $^1\text{H}$  NMR spectra directly from the crude product for benzylamine derivatives and for the other ones was added 3-bromotoluene as an internal standard.

#### Experimental procedures

##### *Typical procedure for the methylation of benzylamine*

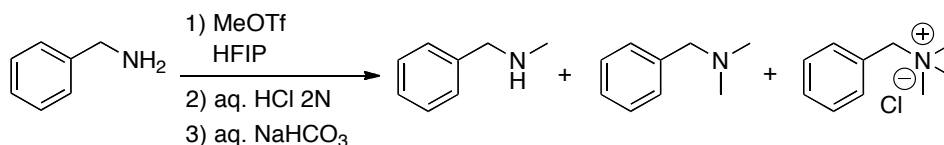

To a solution of HFIP (1.0 mL, 10 mmol) and benzylamine (109  $\mu\text{L}$ , 1 mmol) was added MeOTf (164  $\mu\text{L}$ , 1.5 mmol). The mixture was stirred for 1 h at room temperature and then quenched by a solution of HCl (2N, 1 mL). Volatiles were evaporated under reduced pressure, and the resulting mixture was neutralised with a saturated aqueous solution of  $\text{NaHCO}_3$  and extracted with  $\text{CH}_2\text{Cl}_2$  (3 $\times$ 5 mL). Combined organic phases were dried over  $\text{MgSO}_4$ , filtered and solvent was removed under reduced pressure. The crude product was analysed by  $^1\text{H}$  NMR.

##### *Typical procedure for the methylation of aniline*

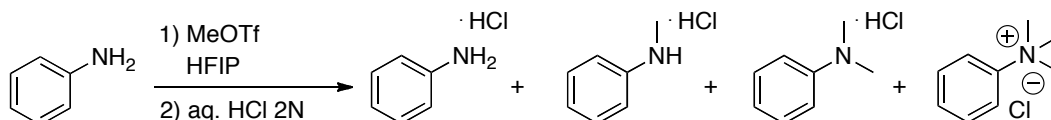

To a solution of HFIP (1.0 mL, 10 mmol) and aniline (91  $\mu\text{L}$ , 1 mmol) was added MeOTf (164  $\mu\text{L}$ , 1.5 mmol). The mixture was stirred for 1 h at room temperature and then quenched by a solution of HCl (2N, 1 mL). Volatiles were evaporated under reduced pressure. 3-Bromotoluene (123  $\mu\text{L}$ , 1 mmol) was added to the crude product and a  $^1\text{H}$  NMR analysis was performed.

## Further experimental data

### Kinetic study of the methylation of benzylamine

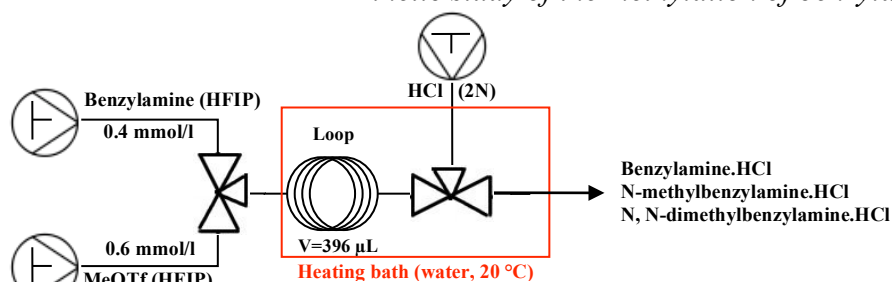

Figure S1: A flow microreactor for the methylation of benzylamine

Kinetic study was performed in a flow microreactor (Figure 1). The first syringe (3 mL) was filled with a mixture of benzylamine (330  $\mu\text{L}$ , 3.03 mmol) in HFIP (1.67 mL). The second syringe (3 mL) contained a mixture of MeOTf (495  $\mu\text{L}$ , 4.52 mmol) and HFIP (1.51 mL, 14.33 mmol). The reaction was quenched *in-situ* by a solution of aq. HCl (2N). Results of this study are shown below (Table S1 and Fig S2).

Table S1: Methylation of benzylamine with 1.5 equivalent of MeOTf in a flow microreactor

| Time (min) | Benzylamine | N-methylbenzylamine | N, N-dimethylbenzylamine |
|------------|-------------|---------------------|--------------------------|
| 0.5        | 70%         | 27%                 | 3%                       |
| 3          | 57%         | 41%                 | 3%                       |
| 7          | 41%         | 54%                 | 5%                       |
| 15         | 32%         | 62%                 | 7%                       |

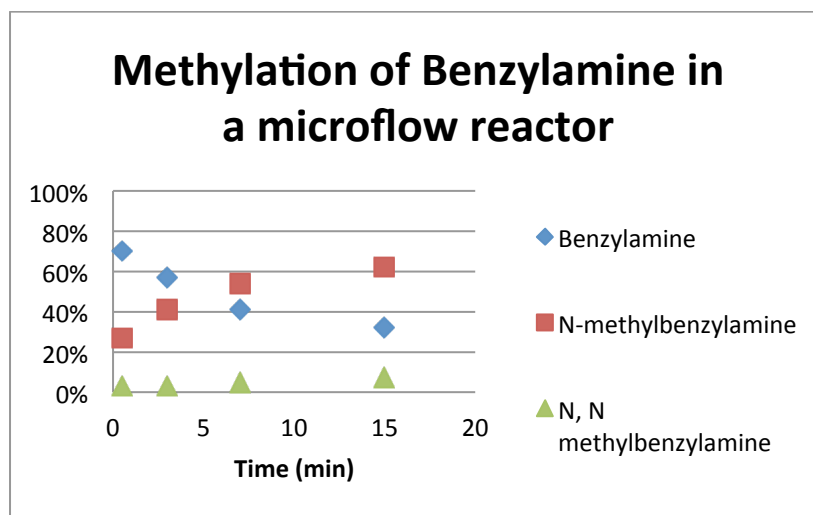

Figure S2: Methylation of benzylamine with 1.5 equivalent of MeOTf

### *Influence of HFIP on the methylating reagent*

This study was performed to show the influence of HFIP on the methylating reagent. The variation of  $\delta_{\text{OH}}$  (HFIP) in  $^1\text{H}$  NMR according to the number of equivalents of methylating reagent was monitored.

### *Typical procedure*

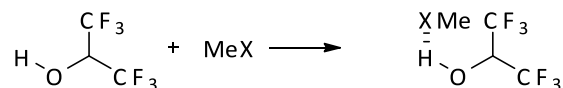

HFIP (50  $\mu\text{L}$ , 475  $\mu\text{mol}$ ) and 600  $\mu\text{L}$  of  $\text{CDCl}_3$  were added into a NMR tube and a  $^1\text{H}$  NMR spectrum was taken. The amount of methylating reagent was increased step by step (0, 0.5, 1, 1.5 and 2 eq) and each time a  $^1\text{H}$  NMR spectrum was recorded (Fig S3).

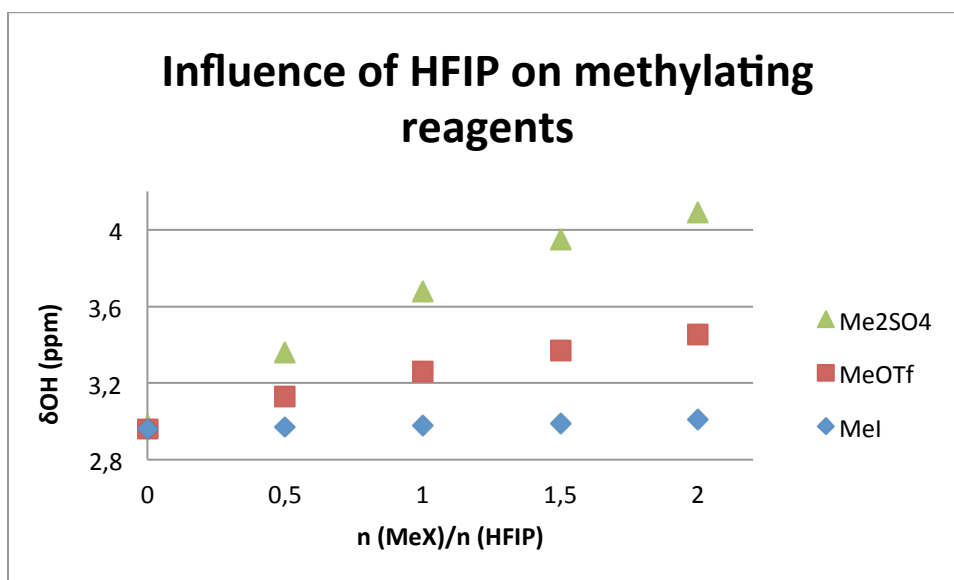

Figure S3  $\Delta\delta_{\text{OH}}$  according to MeX (MeOTf,  $\text{Me}_2\text{SO}_4$  or MeI)

## $^1\text{H}$ NMR spectra

Amines are under hydrochloride salt form and the corresponding  $^1\text{H}$  NMR spectra were recorded in  $\text{CD}_3\text{OD}$ , except where indicated.

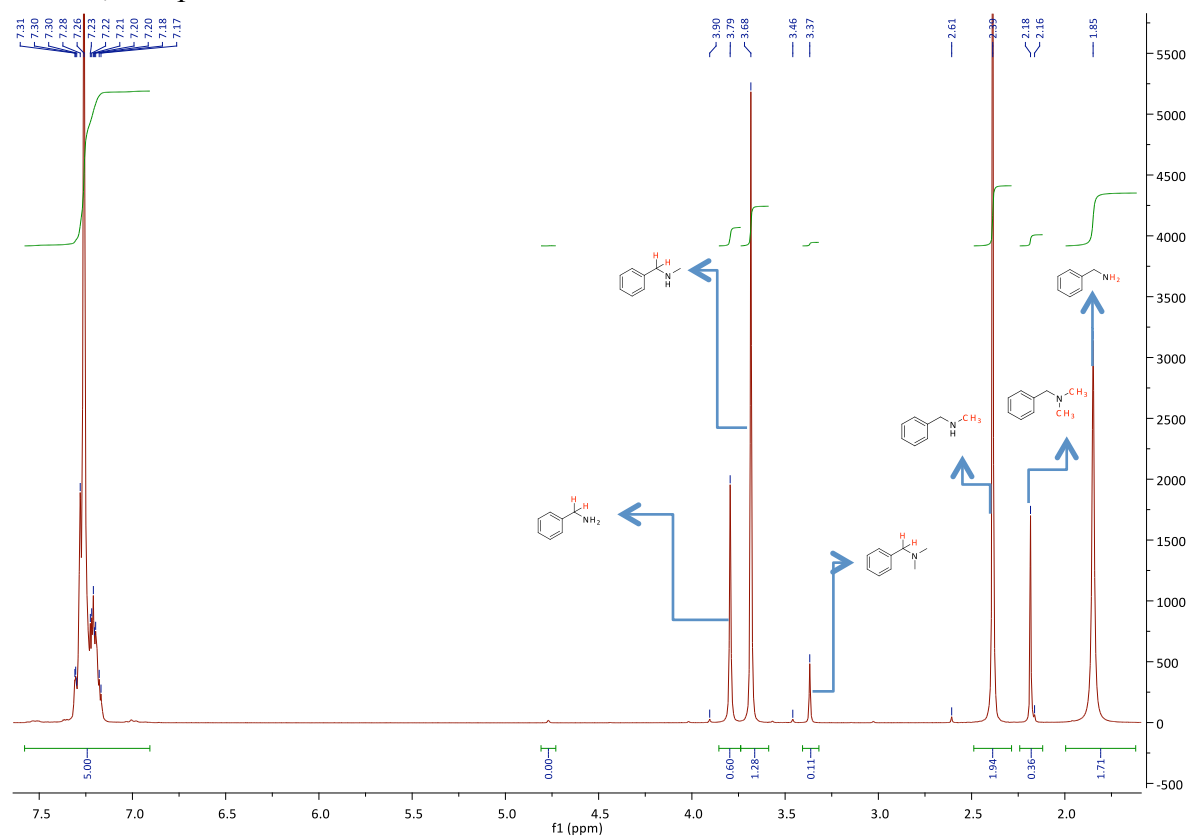

Table 1 ( $\text{CDCl}_3$ , free amine)

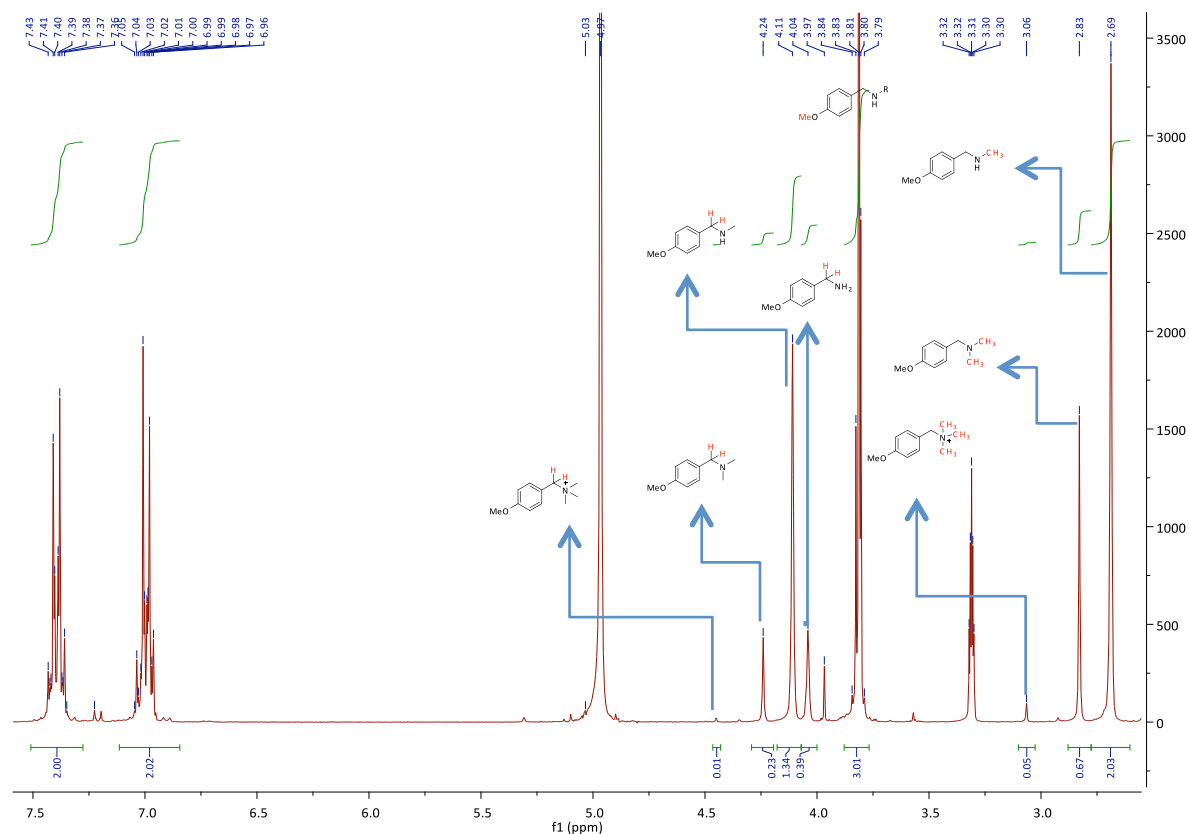

Table 2, entry 1

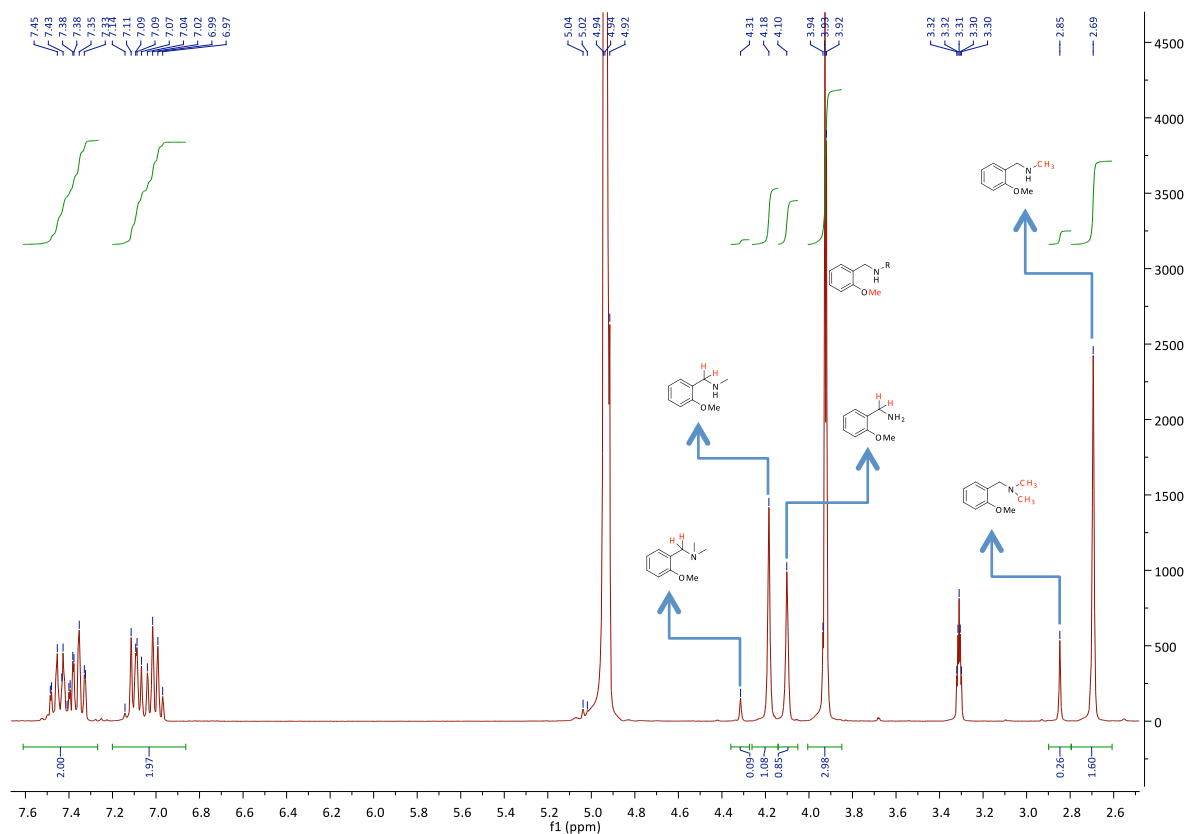

Table 2, entry 2

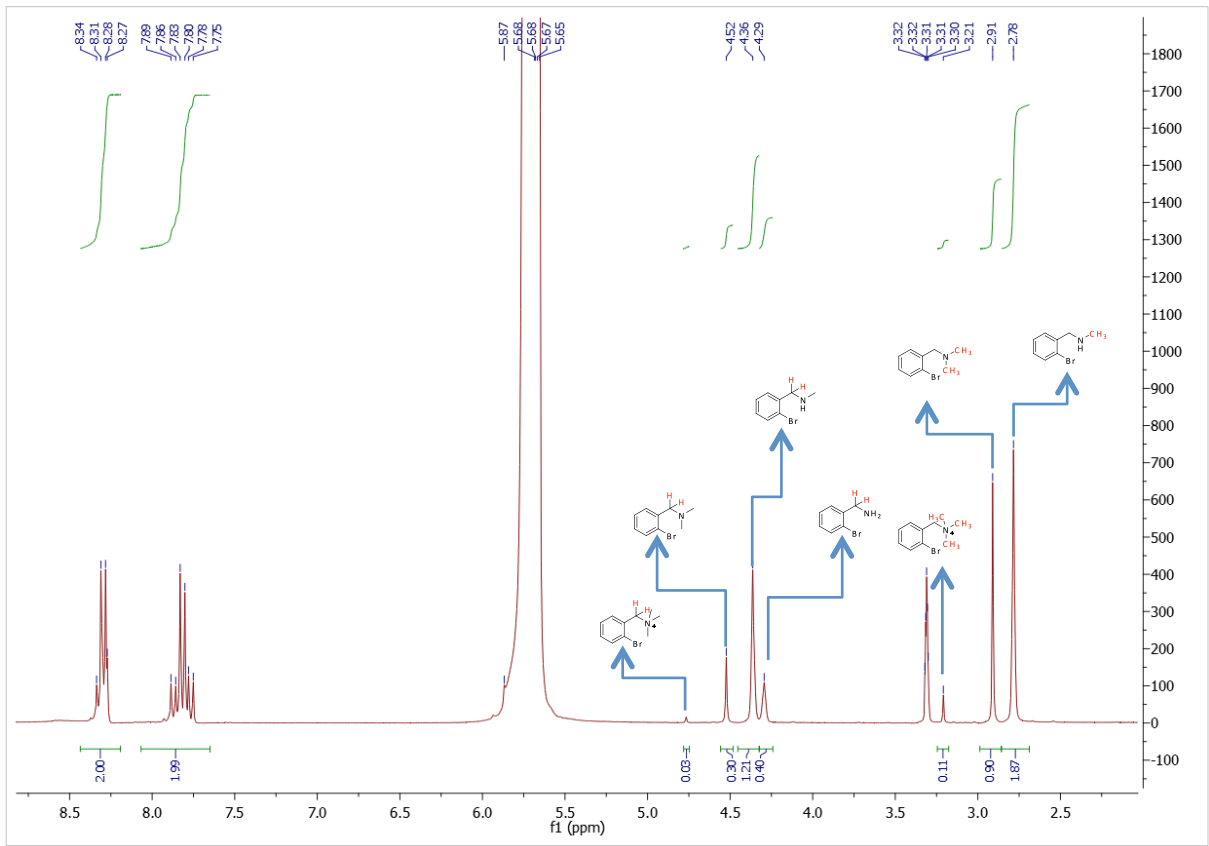

Table 2, entry 3

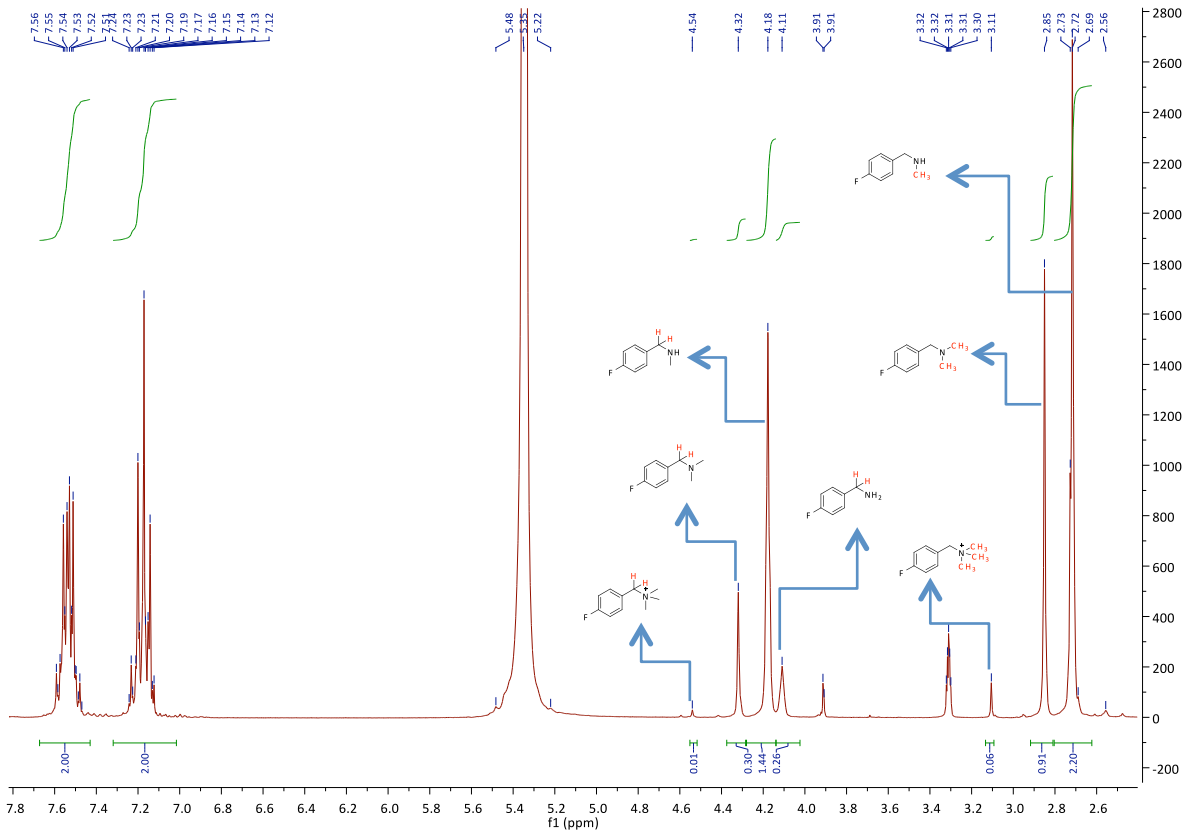

Table 2, entry 4

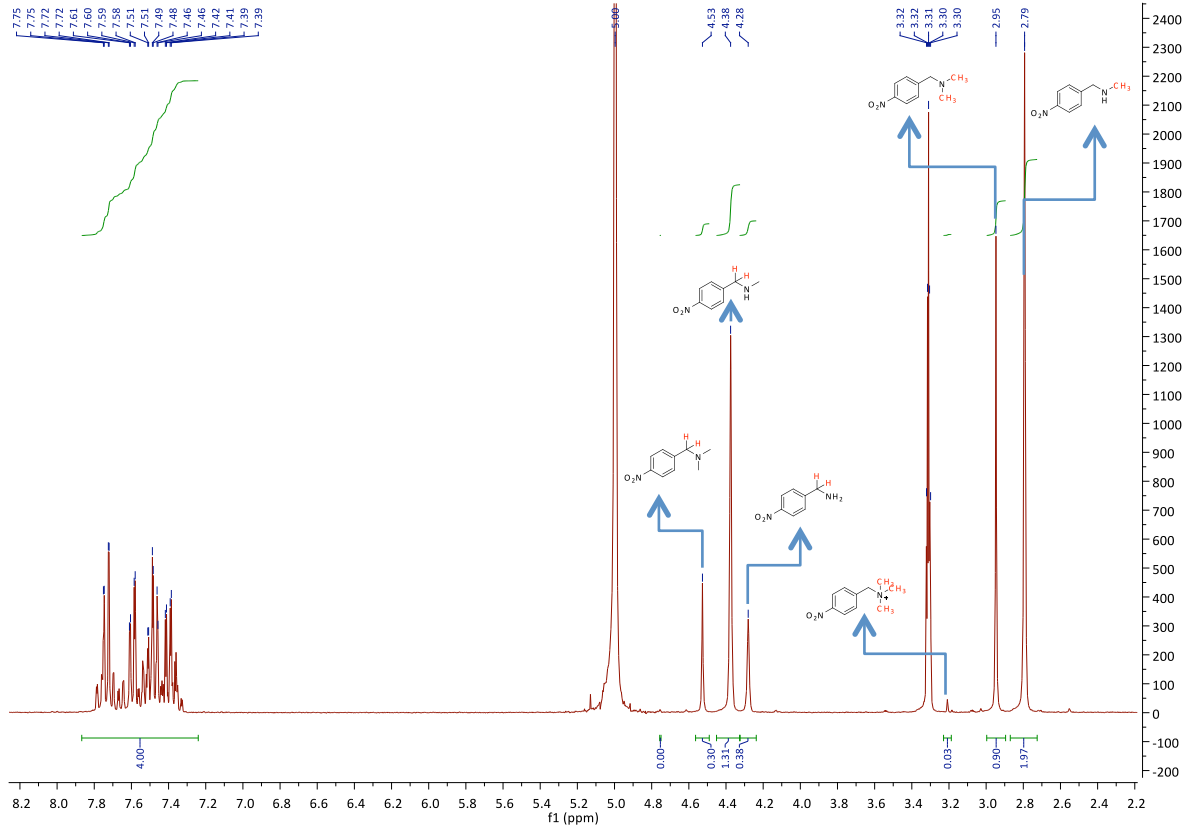

Table 2, entry 5

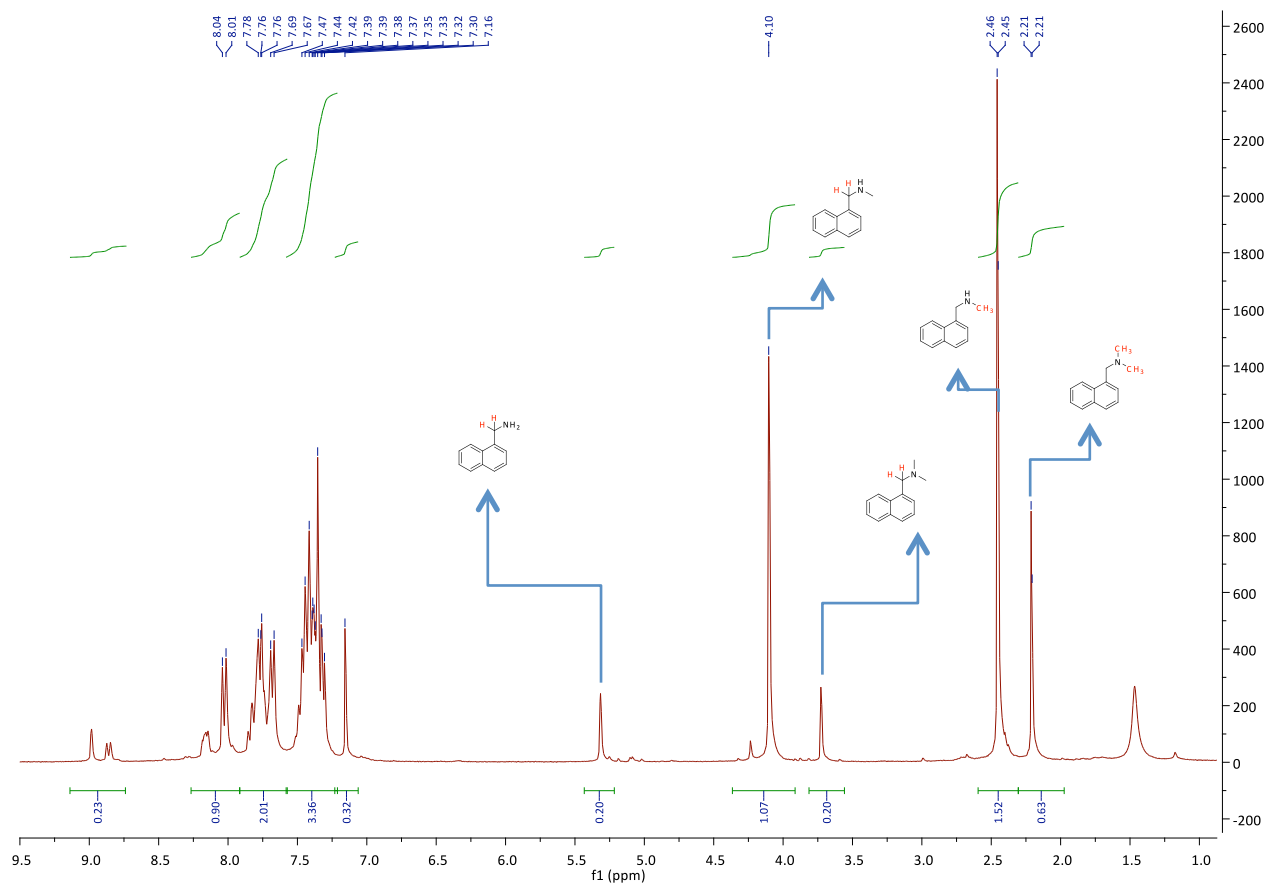

Table 2, entry 6 (CDCl<sub>3</sub>, free amine)

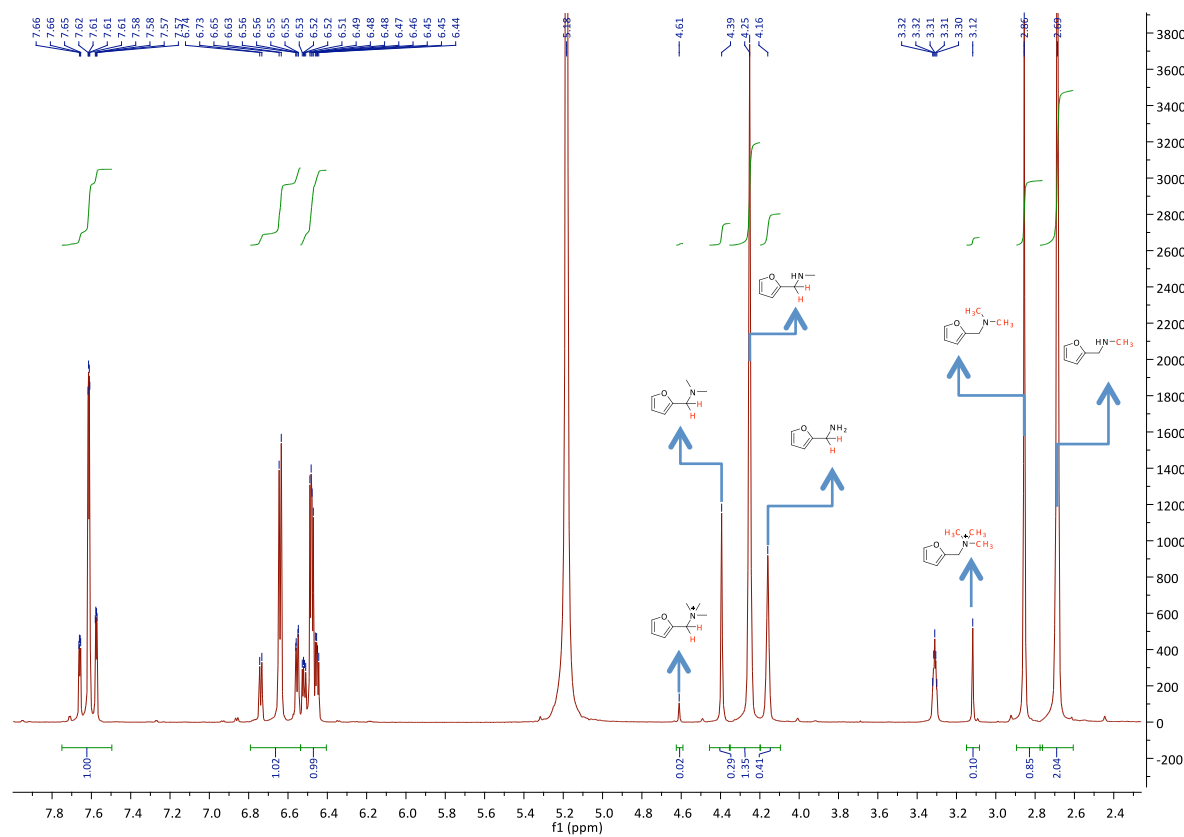

Table 2, entry 7

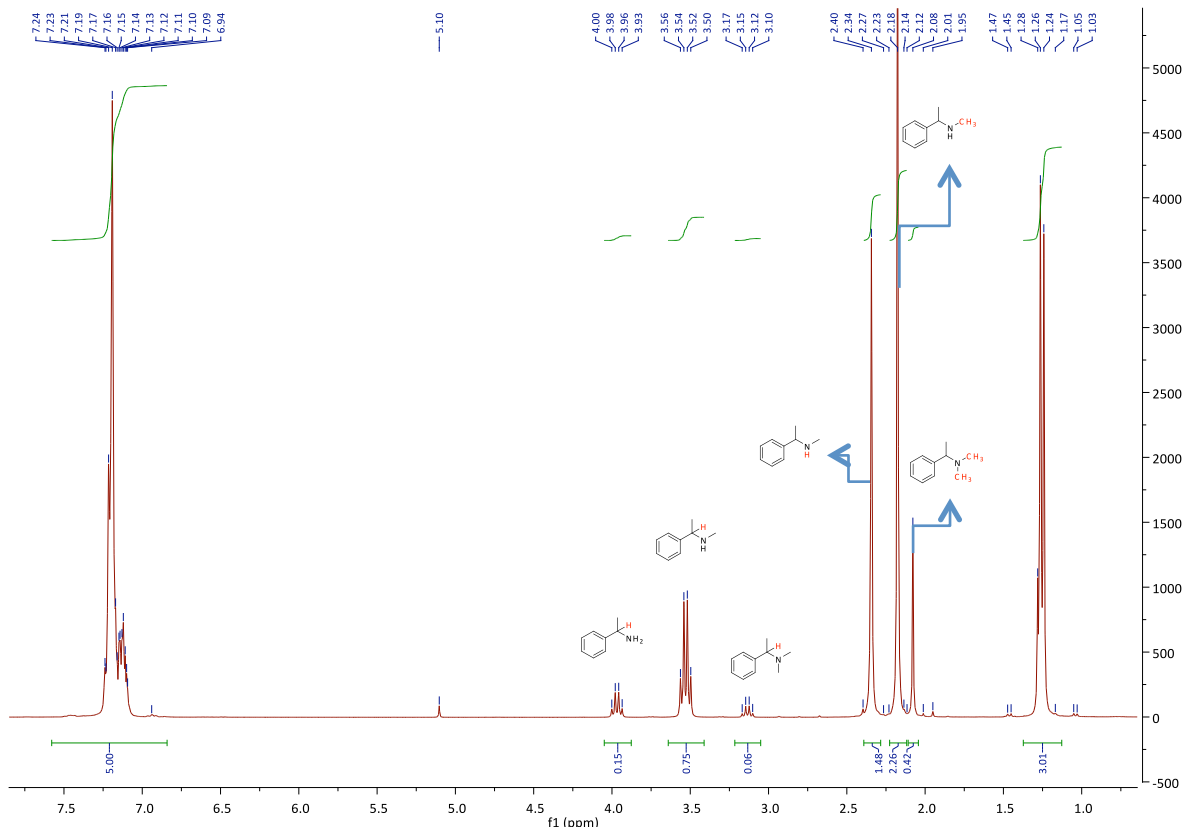

**Table 2, entry 8 (CDCl<sub>3</sub>, free amine)**

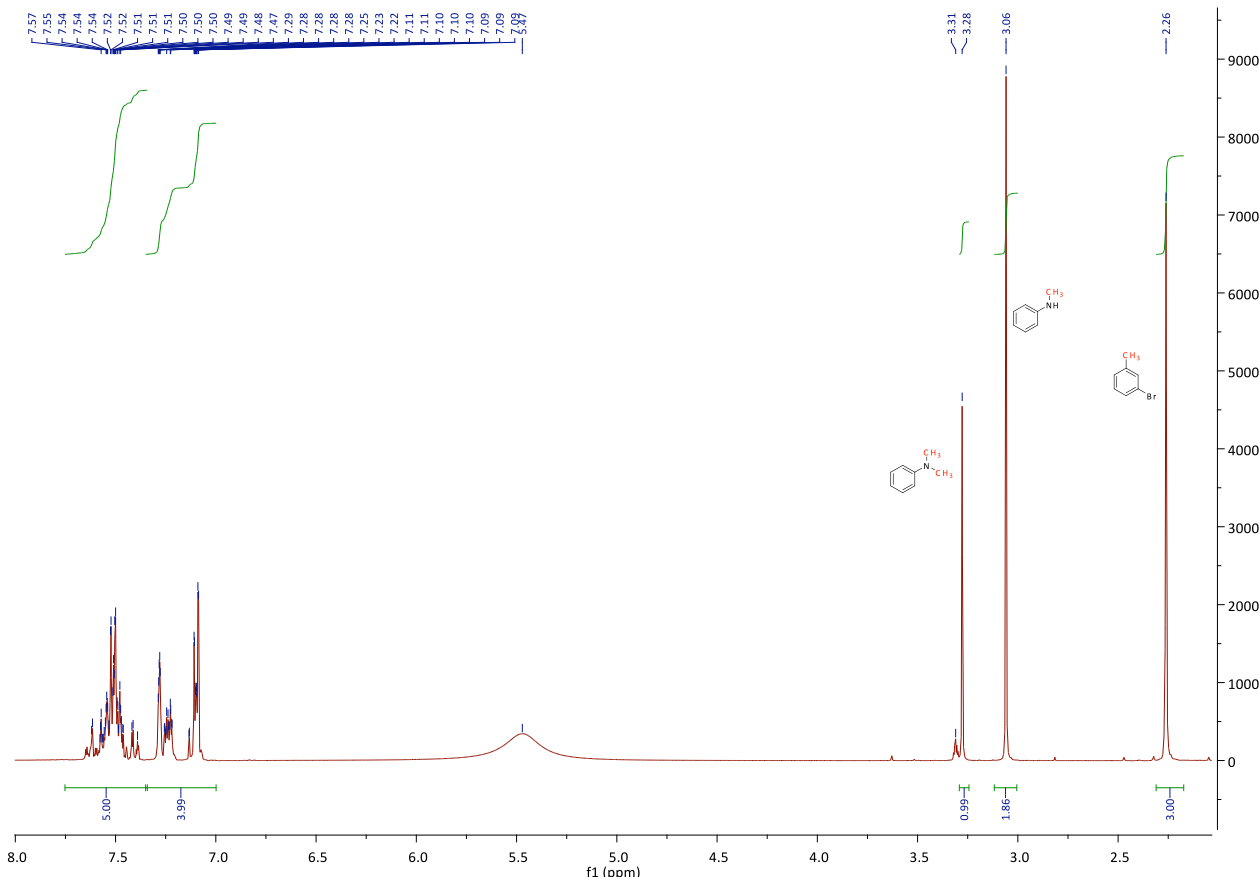

Table 2, entry 9



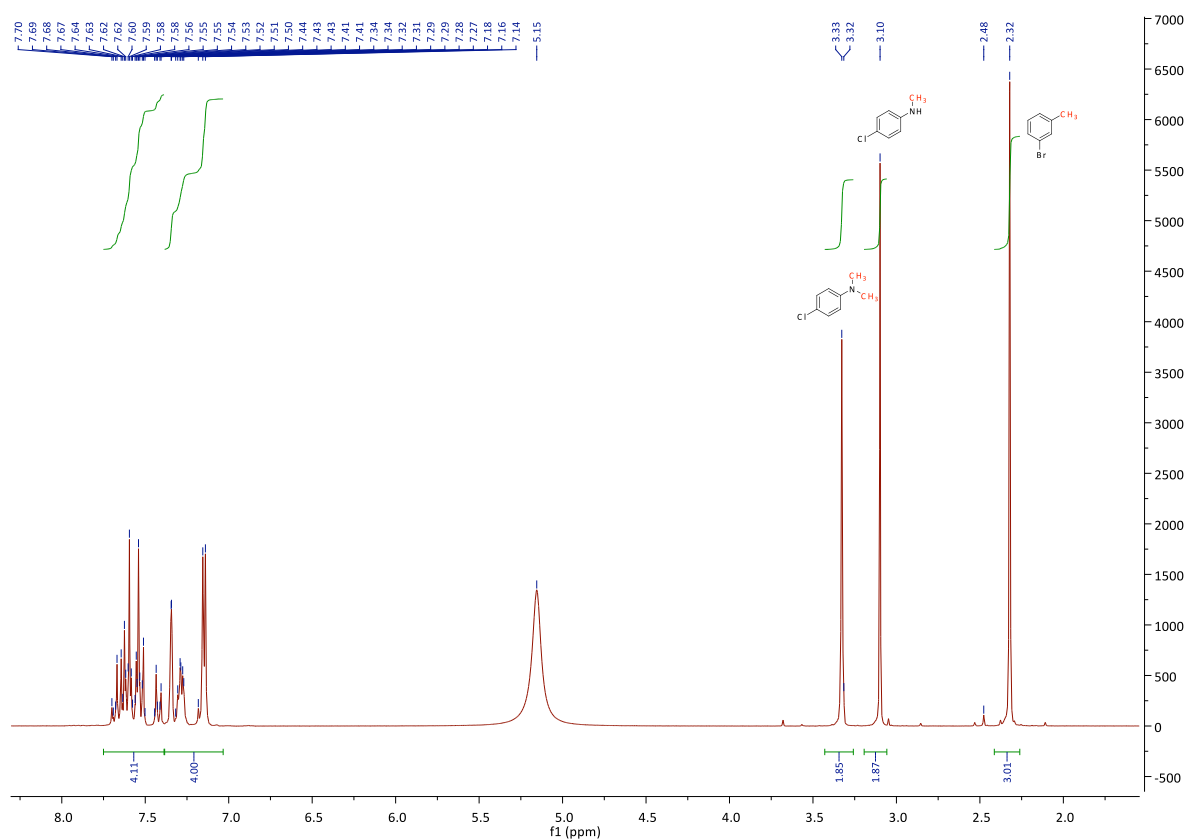

Table 2, entry 10

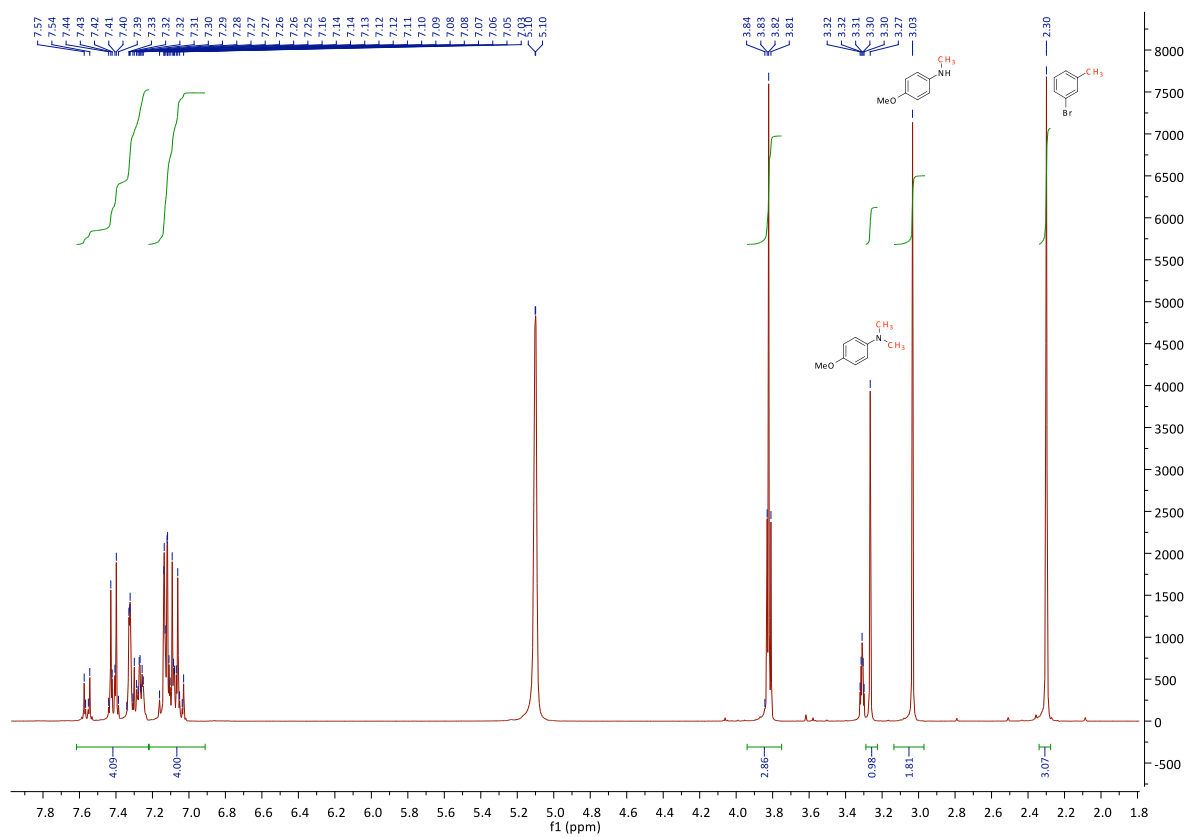

Table 2, entry 11

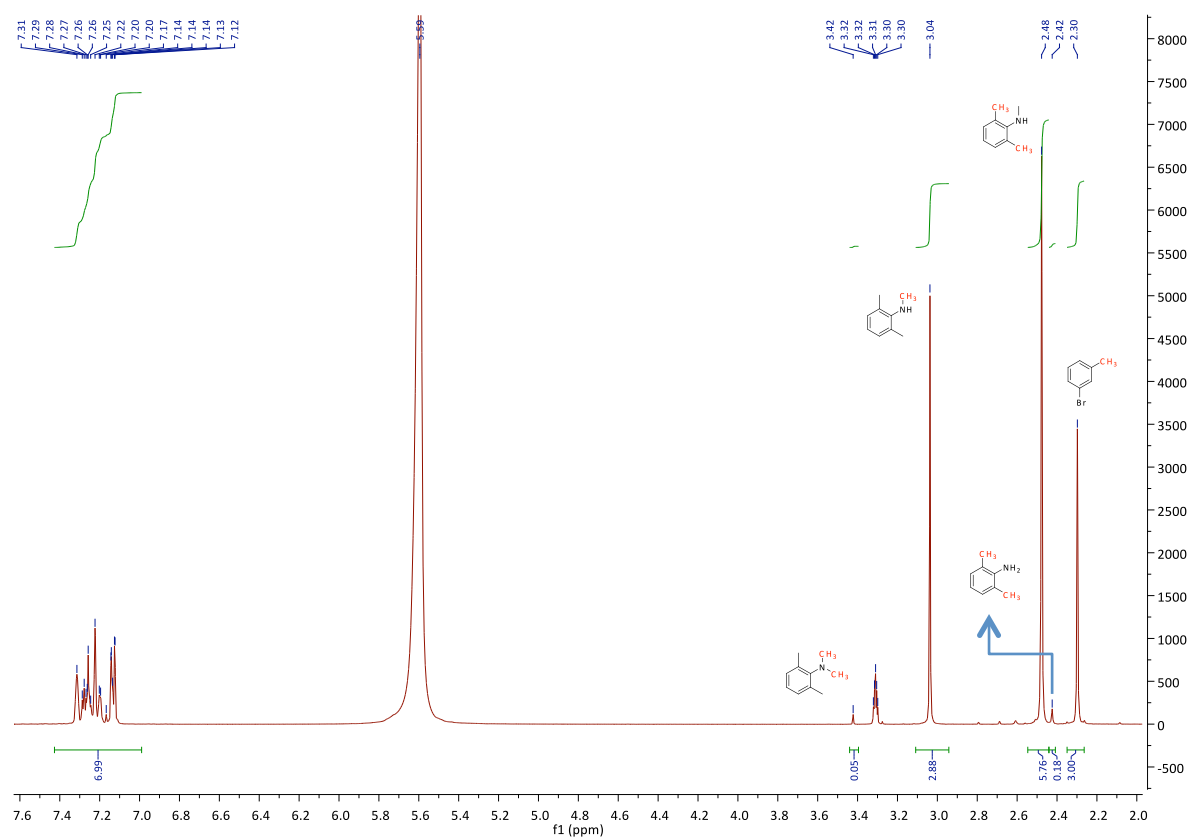

Table 2, entry 12

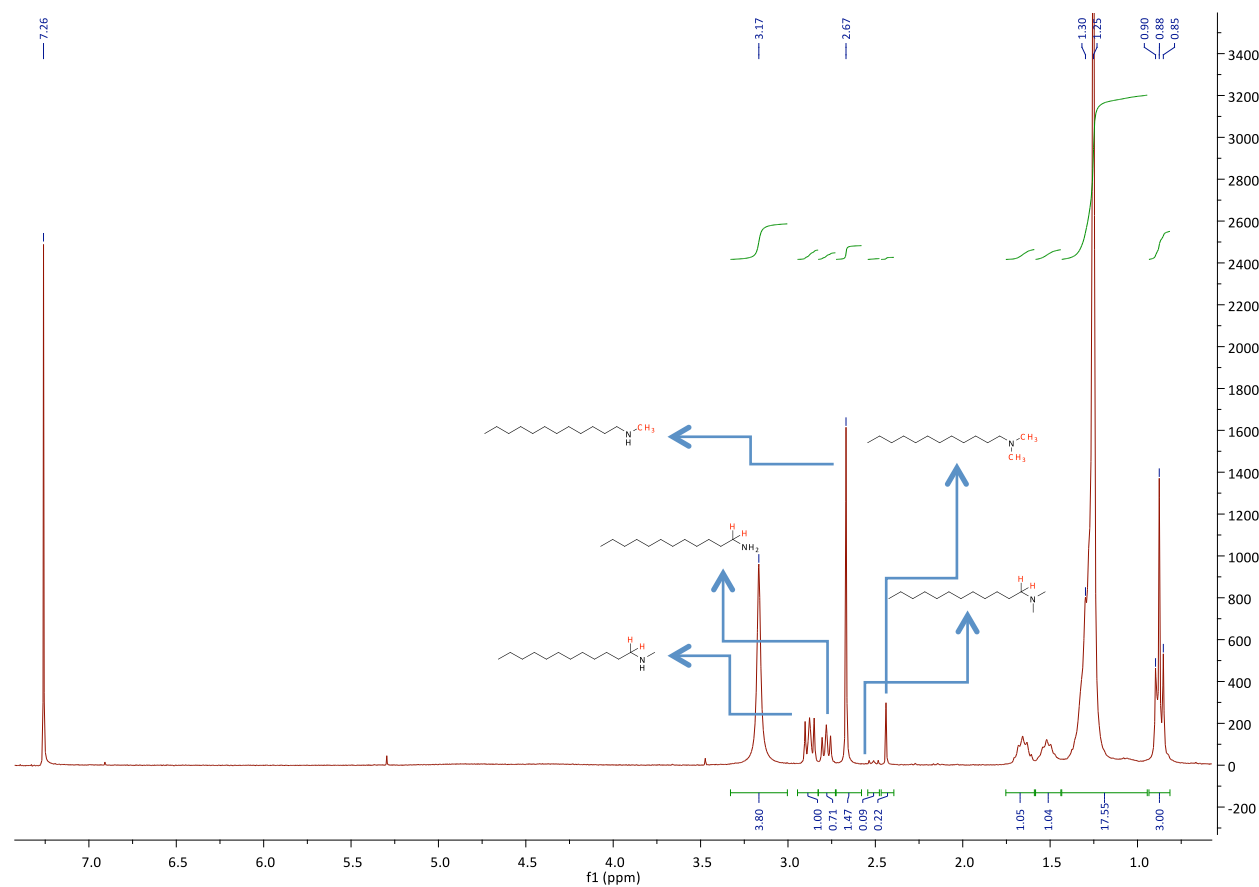

Table 2, entry 13 (CDCl<sub>3</sub>, free amine)

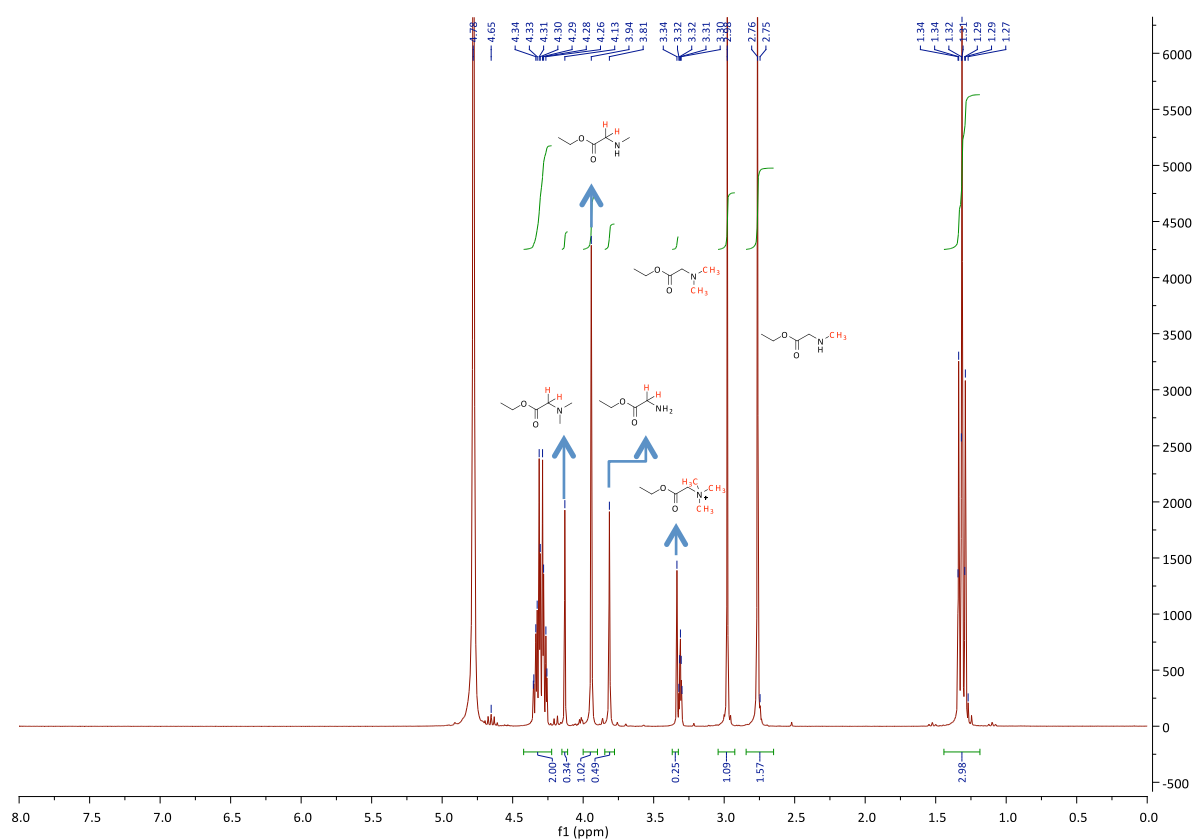

Table 2, entry 14

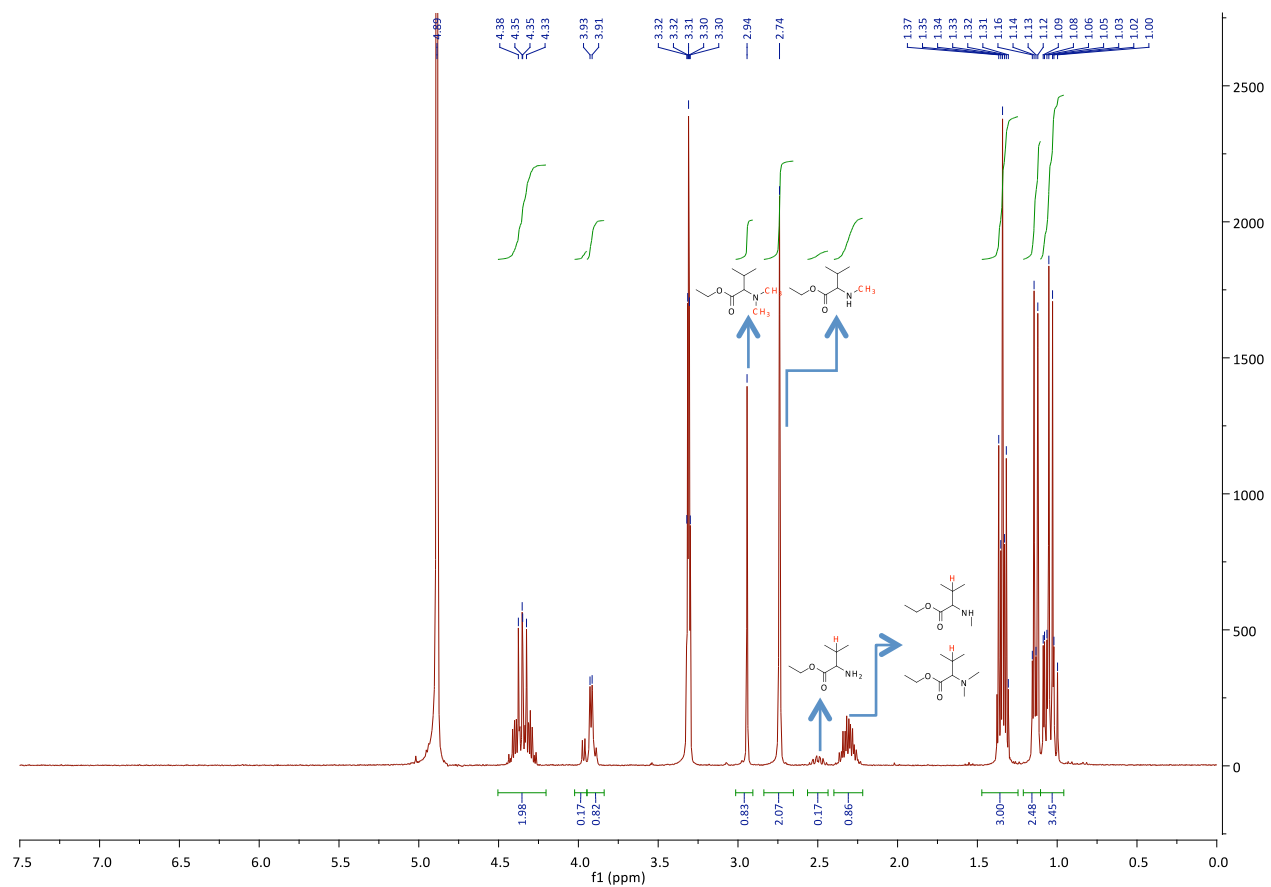

Table 2, entry 15

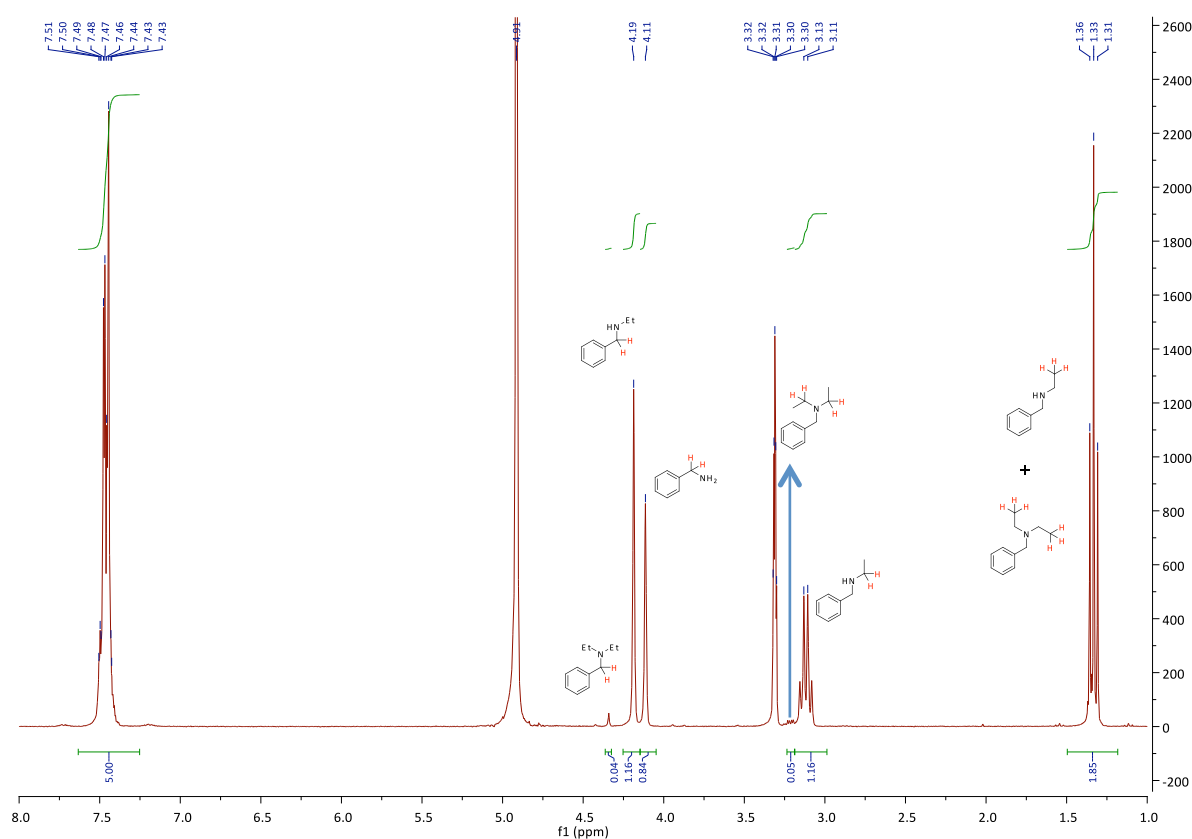

Ethylation of benzylamine
